# Supplementary material for: Steering lithium and potassium storage mechanism in covalent organic frameworks by incorporating transition metal single atoms
Source: PubMed Central journal article supplement — Proc Natl Acad Sci U S A. 2024 Mar 19;121(13):e2315407121. doi: 10.1073/pnas.2315407121 (PMC10990087; doi:10.1073/pnas.2315407121), 2024-03-19
Supplement: pnas.2315407121.sapp.pdf [file pnas.2315407121.sapp.pdf]

## Supporting Information for

### Steering lithium and potassium storage mechanism in covalent organic frameworks by incorporating transition metal single atoms

*Yingnan Cao<sup>1</sup>, Qing Xu<sup>2</sup>, Yi Sun<sup>1</sup>, Jixin Shi<sup>3</sup>, Yi Xu<sup>1</sup>, Yongfu Tang<sup>4</sup>, Xiudong Chen<sup>5</sup>, Shuai Yang<sup>6,7</sup>, Zheng Jiang<sup>8</sup>, Han-Don Um<sup>9</sup>, and Xiaopeng Li<sup>3\*</sup>, Yong Wang<sup>1\*</sup>*

\*Email of corresponding authors: xiaopeng.li@dhu.edu.cn (Xiaopeng Li); yongwang@shu.edu.cn (Yong Wang)

#### **This file includes:**

Supporting text  
Figures S1 to S26  
Tables S1 to S3

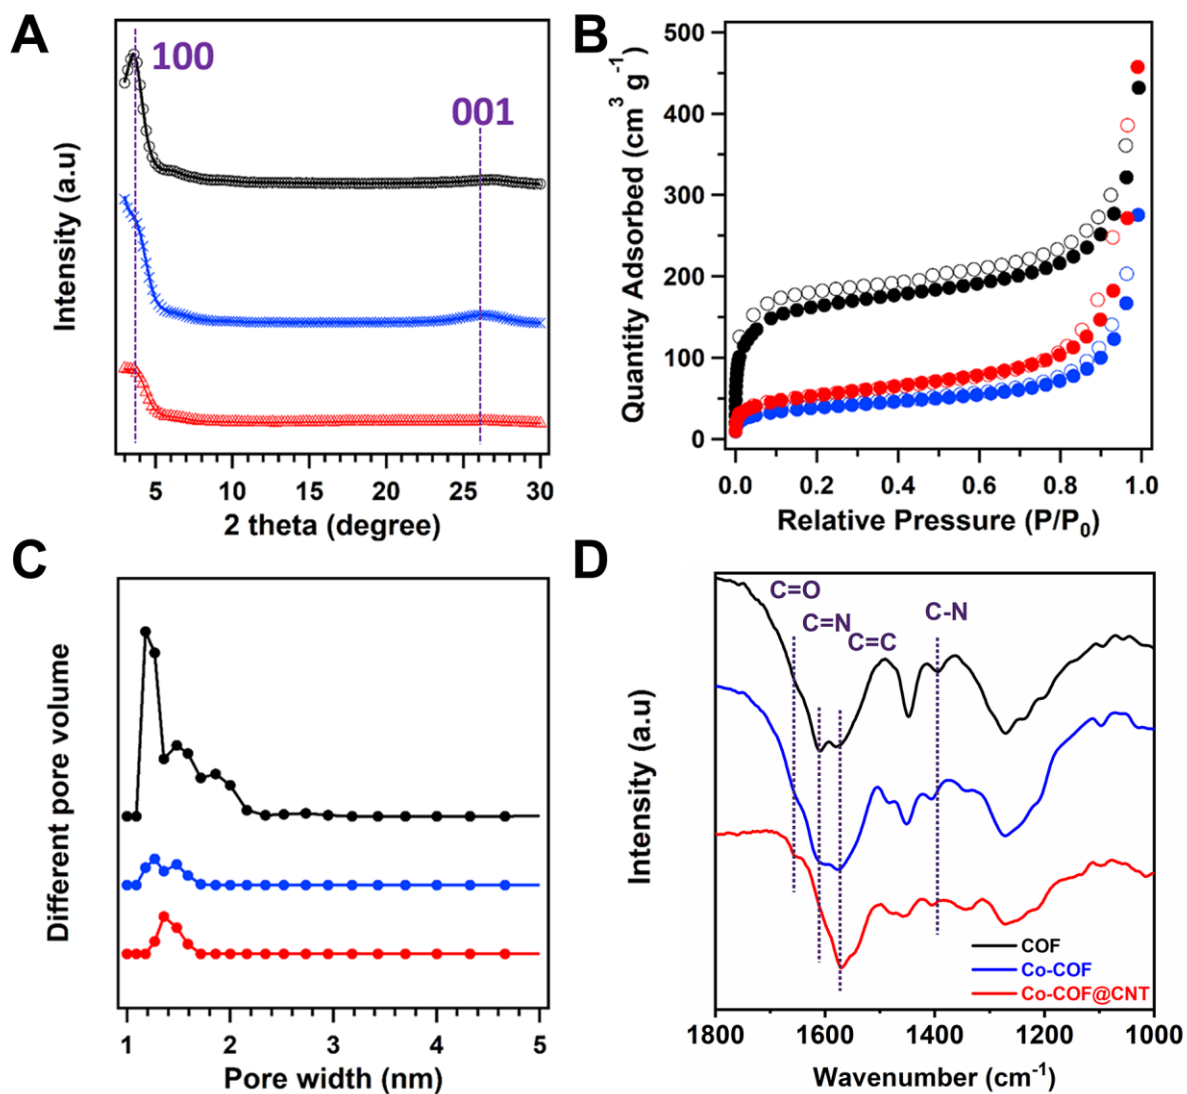

**Fig. S1. Structure characterizations of TP-BPY-COF, Co-COF, and Co-COF@CNT. (A)** PXRD patterns, **(B)** Nitrogen sorption isotherm profiles, **(C)** pore size distribution curves, and **(D)** FT-IR spectra.

**Notes:** black, blue, and red stands for TP-BPY-COF, Co-COF, and Co-COF@CNT, respectively.

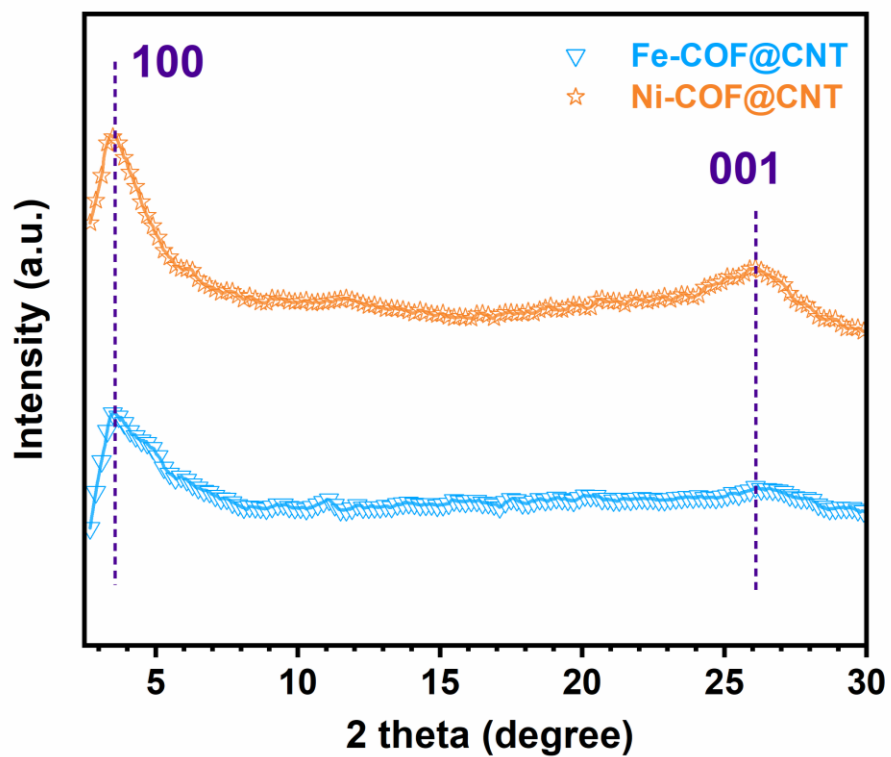

Fig. S2. PXRD spectra of Fe-COF@CNT (blue) and Ni-COF@CNT (yellow).

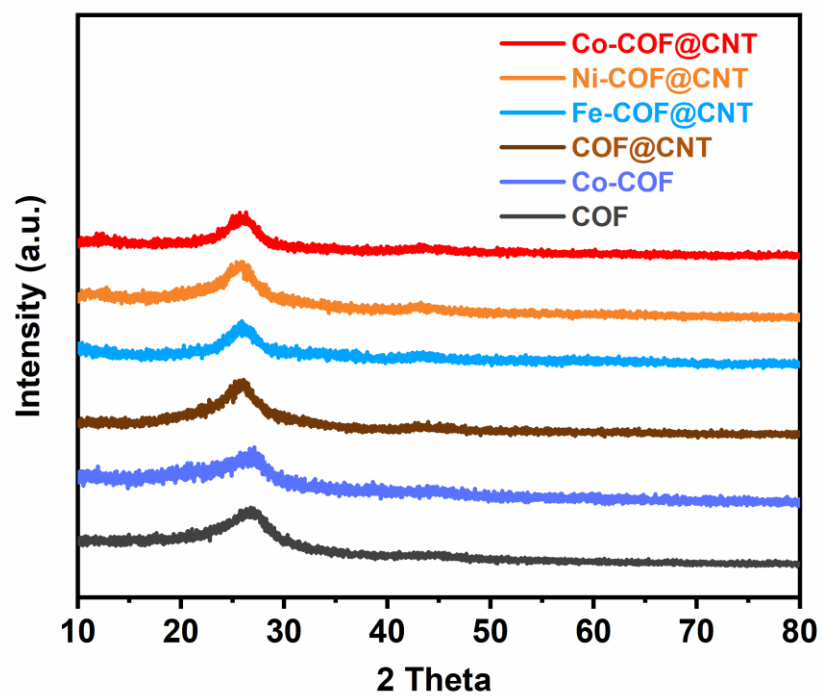

Fig. S3. PXRD spectra of various samples.

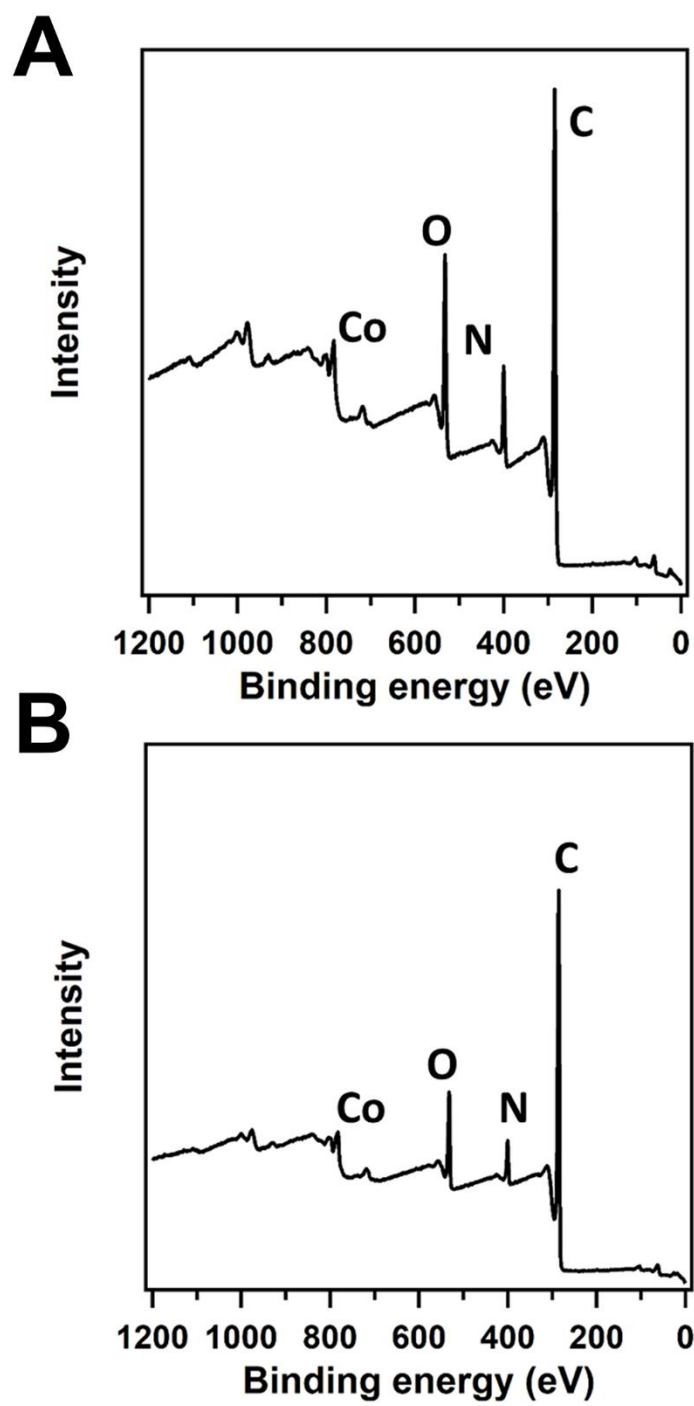

Fig. S4. The survey XPS spectrum of (A) Co-COF and (B) Co-COF@CNT.

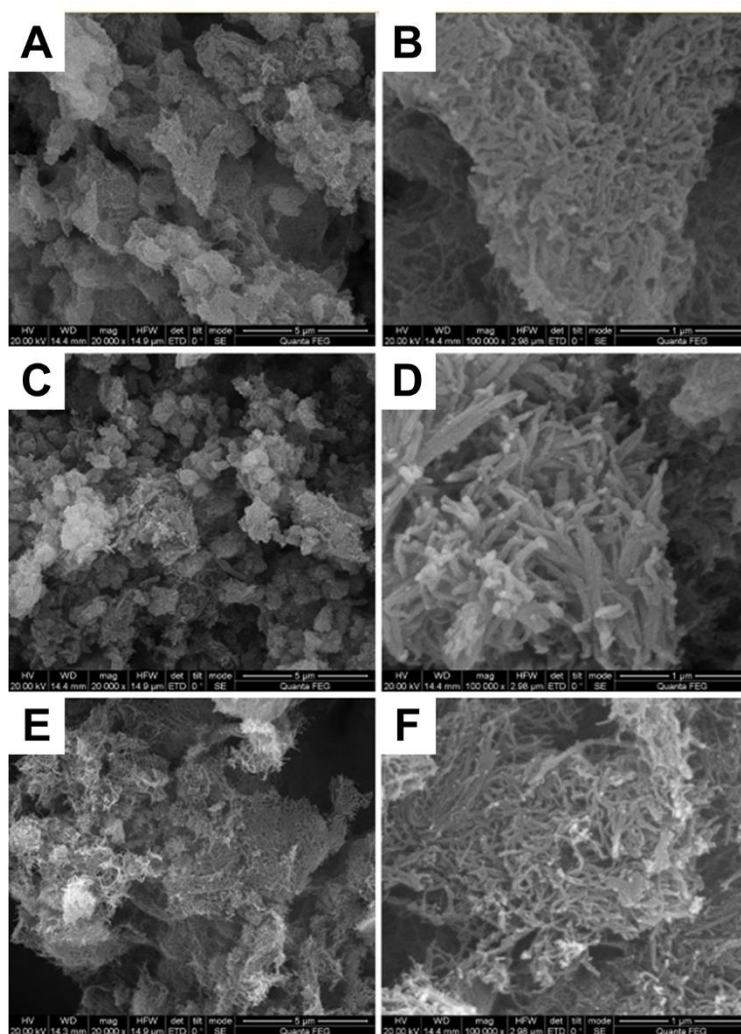

**Fig. S5. SEM images of (A, B) TP-BPY-COF, (C, D) Co-COF, and (E, F) Co-COF@CNT.**

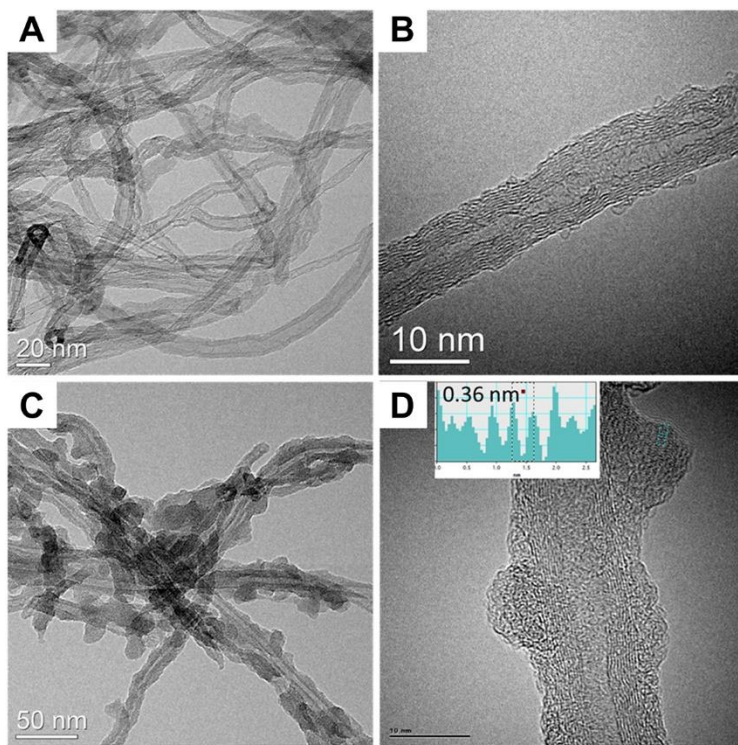

**Fig. S6.** TEM images of (A, B) CNT and (C, D) Co-COF@CNT.

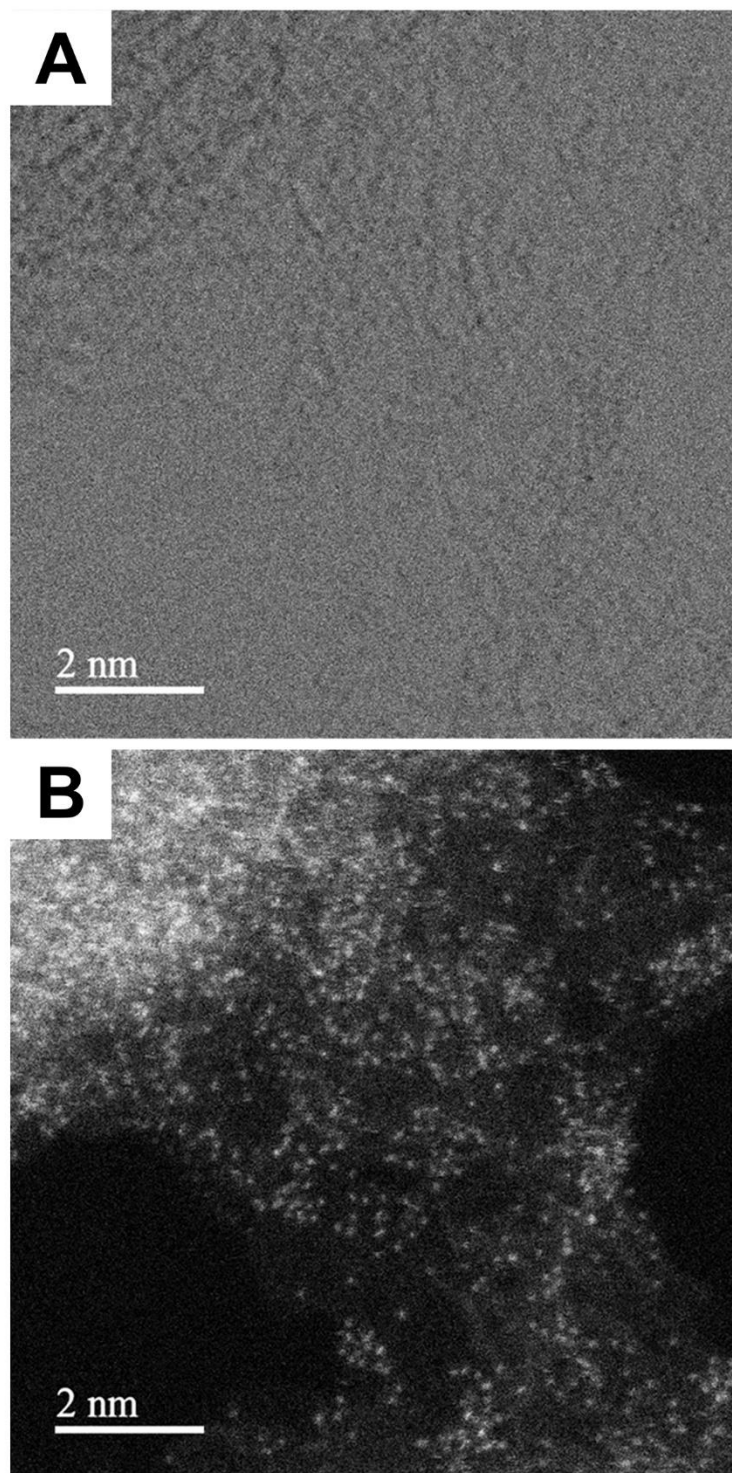

Fig. S7. (A) High-resolution bright-field TEM and (B) the corresponding HAADF-STEM images of Co-COF.



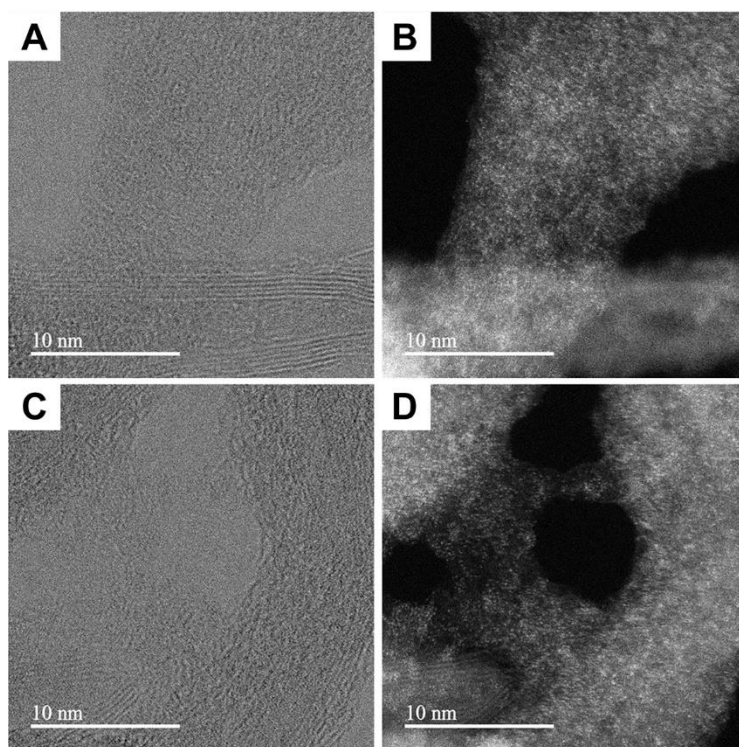

**Fig. S8. (A, C) High-resolution bright-field TEM and (B, D) the corresponding HAADF-STEM images of Co-COF@CNT.**

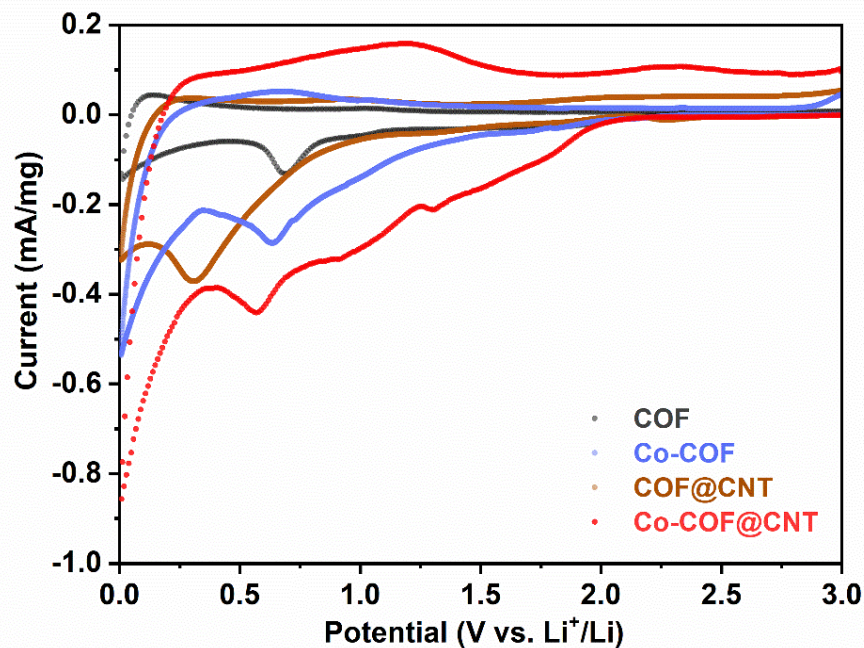

**Fig. S9.** Initial CV curves of the TP-BPY-COF, Co-COF, COF@CNT, and Co-COF@CNT electrodes for LIBs during 0.01-3.0 V at 0.1 mV s<sup>-1</sup>. Notes: TP-BPY-COF (black), Co-COF (purple), COF@CNT (brown), and Co-COF@CNT (red).

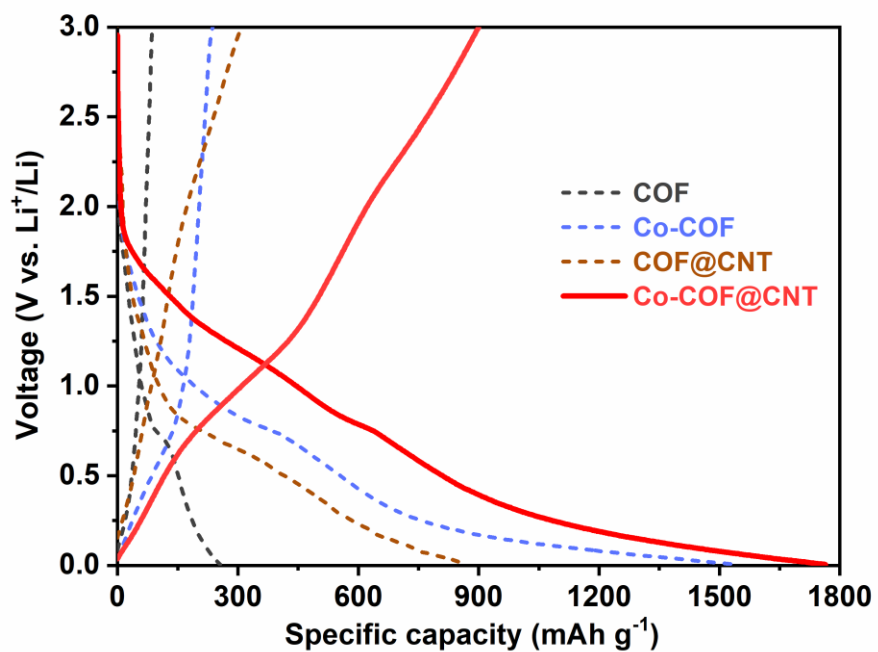

**Fig. S10.** Initial discharge and charge profiles of the TP-BPY-COF, Co-COF, COF@CNT, and Co-COF@CNT electrodes for LIBs at 100 mA g<sup>-1</sup>. Notes: TP-BPY-COF (black), Co-COF (purple), COF@CNT (brown), and Co-COF@CNT (red).

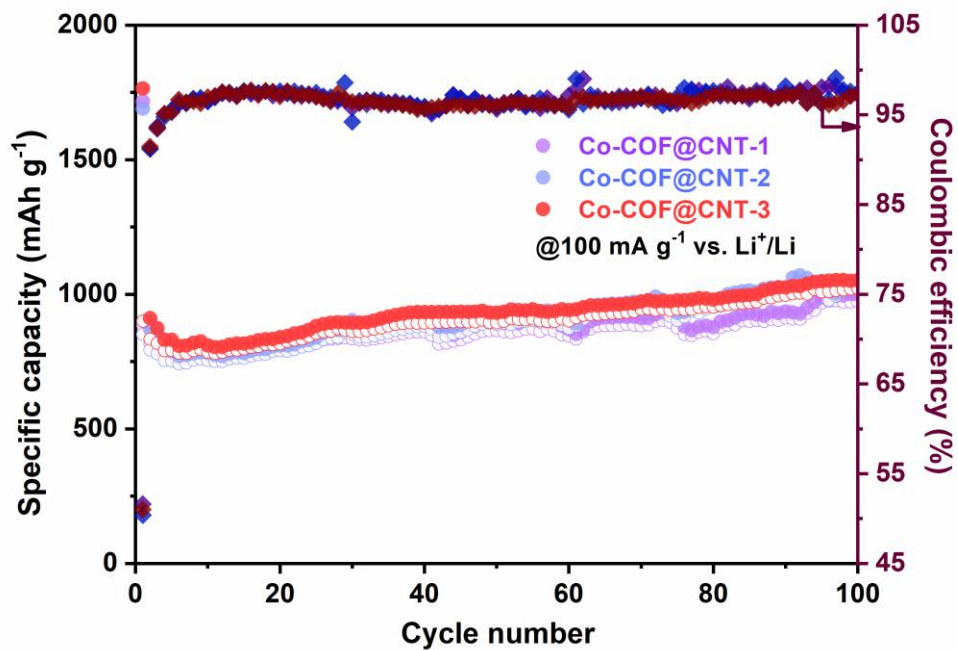

Fig. S11. Specific capacities and Coulombic efficiencies of the Co-COF@CNT electrode for 3 cells in LIBs.

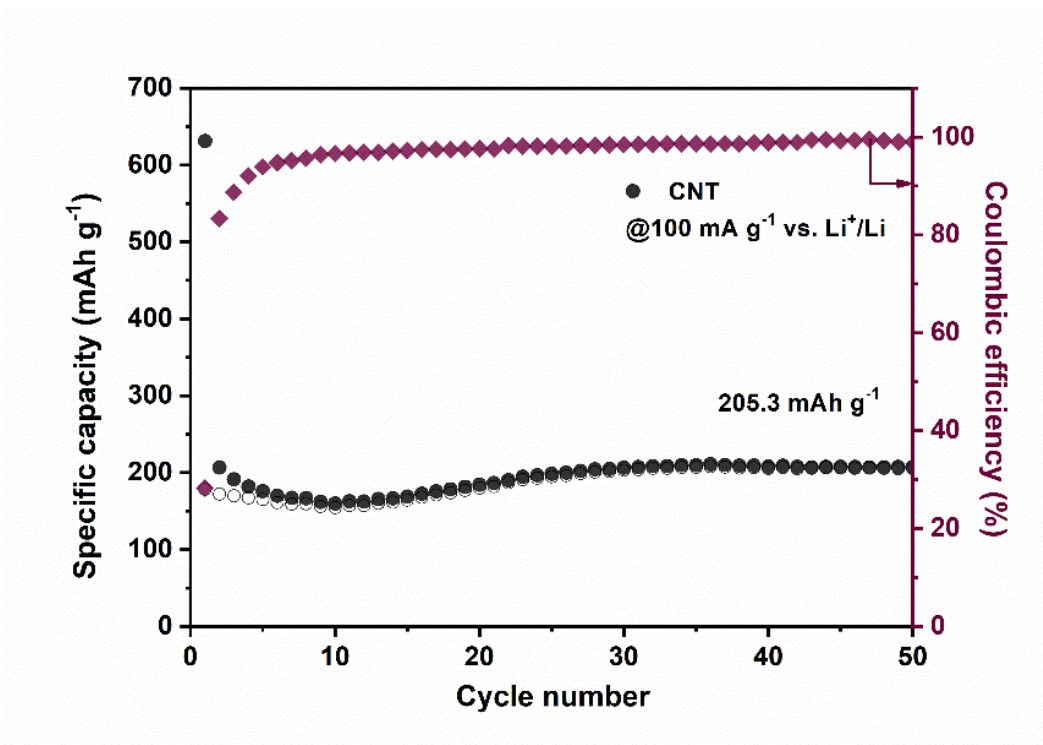

Fig. S12. Cycling performance of CNTs for LIBs. Specific capacity of CNTs at  $100 \text{ mA g}^{-1}$  vs.  $\text{Li}^+/\text{Li}$ .

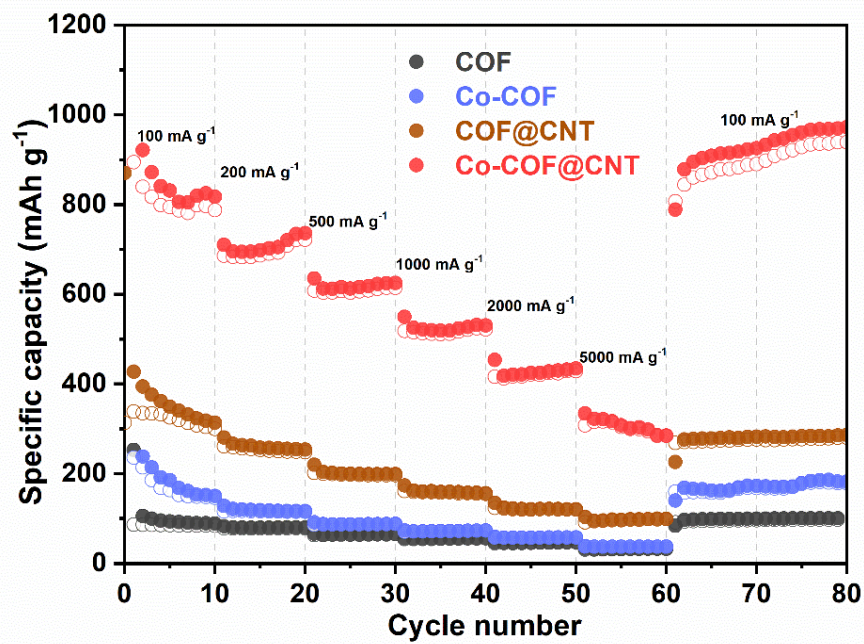

Fig. S13. Rate capabilities of TP-BPY-COF, Co-COF, COF@CNT, and Co-COF@CNT electrodes for LIBs.

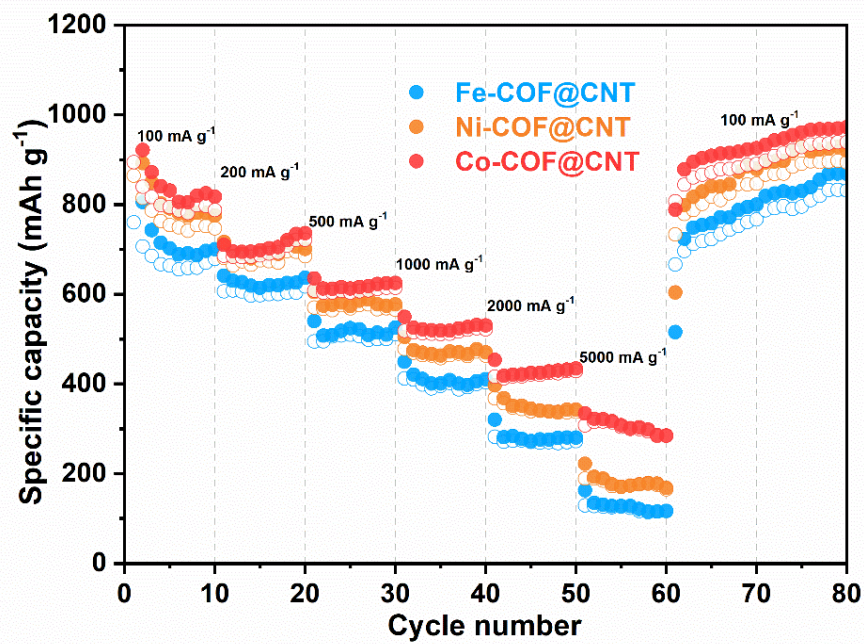

Fig. S14. Rate capabilities of Fe-COF@CNT, Ni-COF@CNT, and Co-COF@CNT for LIBs.

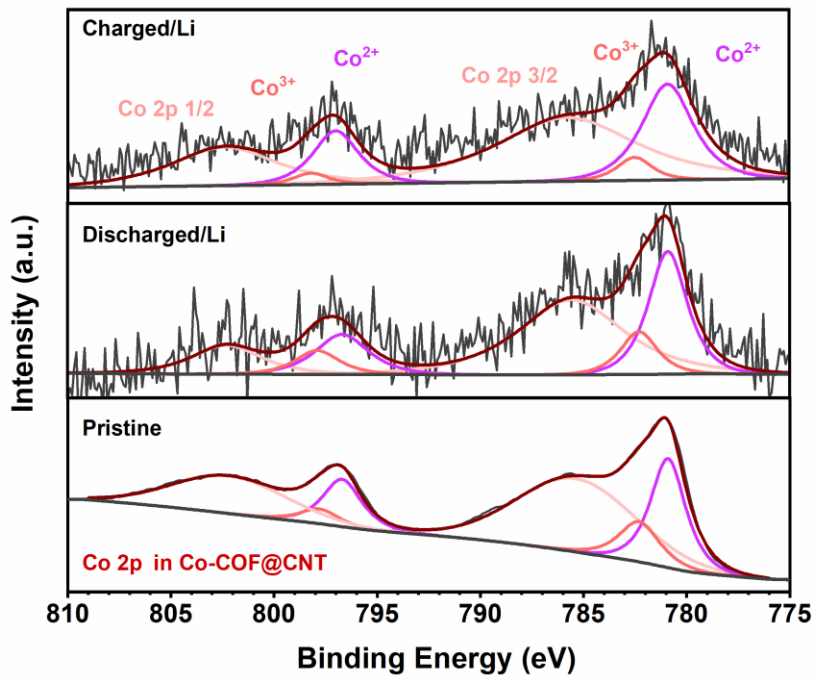

Fig. S15. XPS results of the Co 2p spectrum during the lithiation and delithiation process.



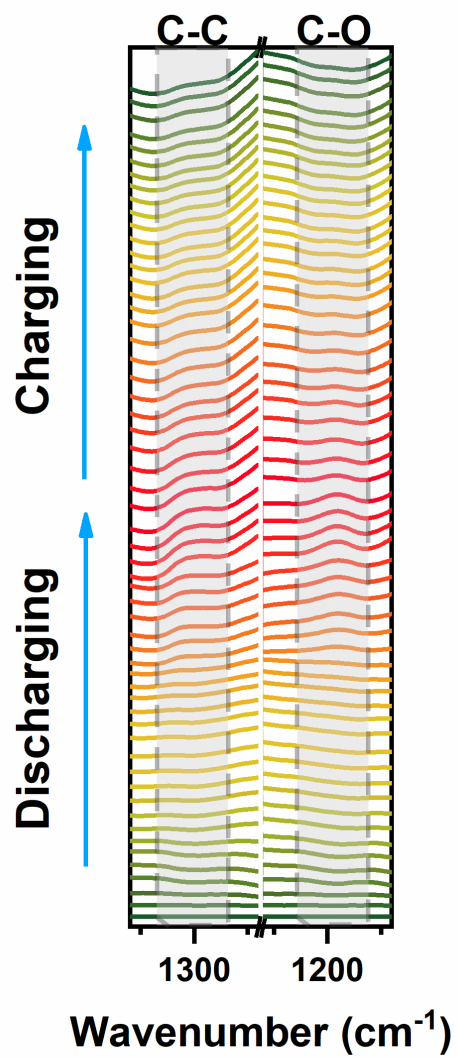

Fig. S16. *In-situ* FT-IR spectra of the Co-COF@CNT electrode in LIBs. Notes: upward indicates the generation.

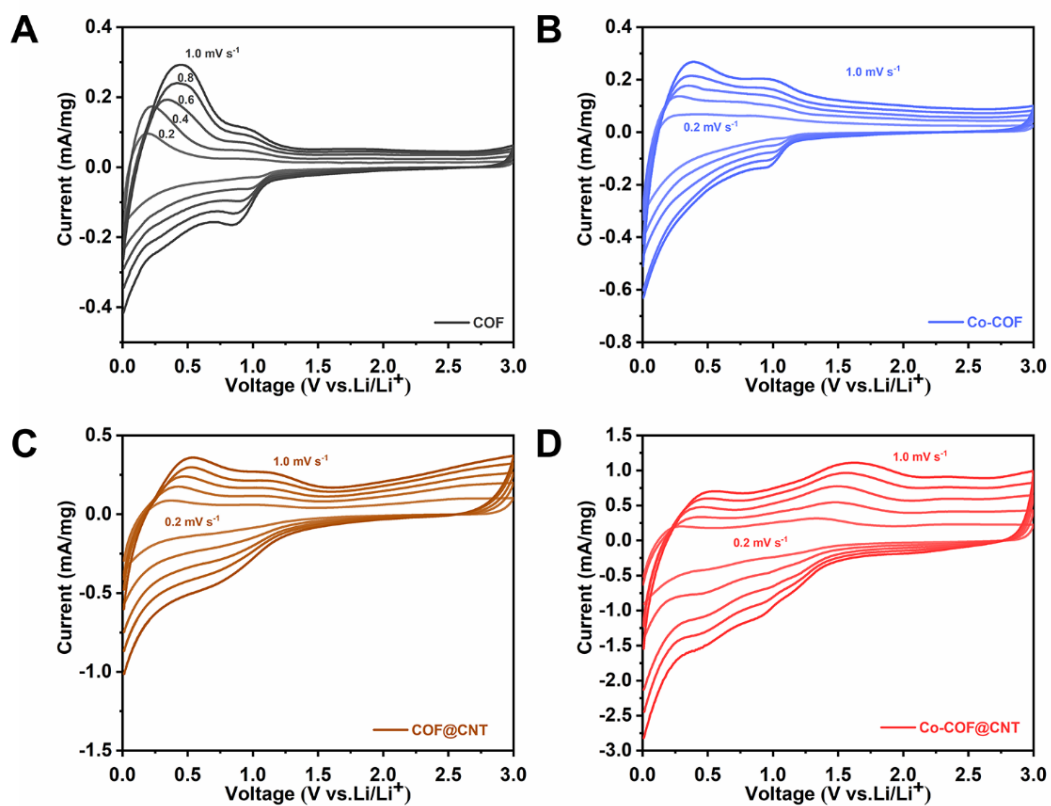

**Fig. S17.** CV curves at different scan rates ranging from 0.2 to 1.0 mV s<sup>-1</sup> vs. Li<sup>+</sup>/Li. (A) TP-BPY-COF, (B) Co-COF, (C) COF@CNT, and (D) Co-COF@CNT.

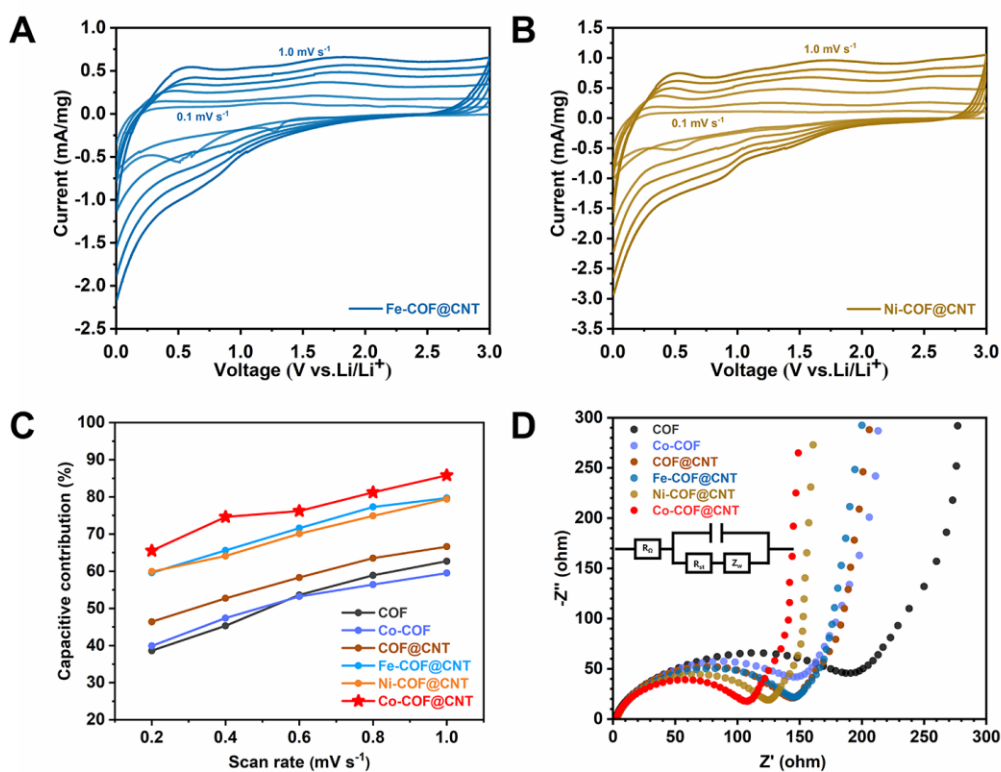

**Fig. S18.** CV curves at different scan rates ranging from 0.1 to 1.0  $\text{mV s}^{-1}$  vs.  $\text{Li}^+/\text{Li}$ . (A) Fe-COF@CNT, and (B) Ni-COF@CNT. (C) The capacitive contribution and (D) Nyquist plots of TP-BPY-COF (black), Co-COF (purple), COF@CNT (brown), Fe-COF@CNT (blue), Ni-COF@CNT (yellow), and Co-COF@CNT (red) vs.  $\text{Li}^+/\text{Li}$ .

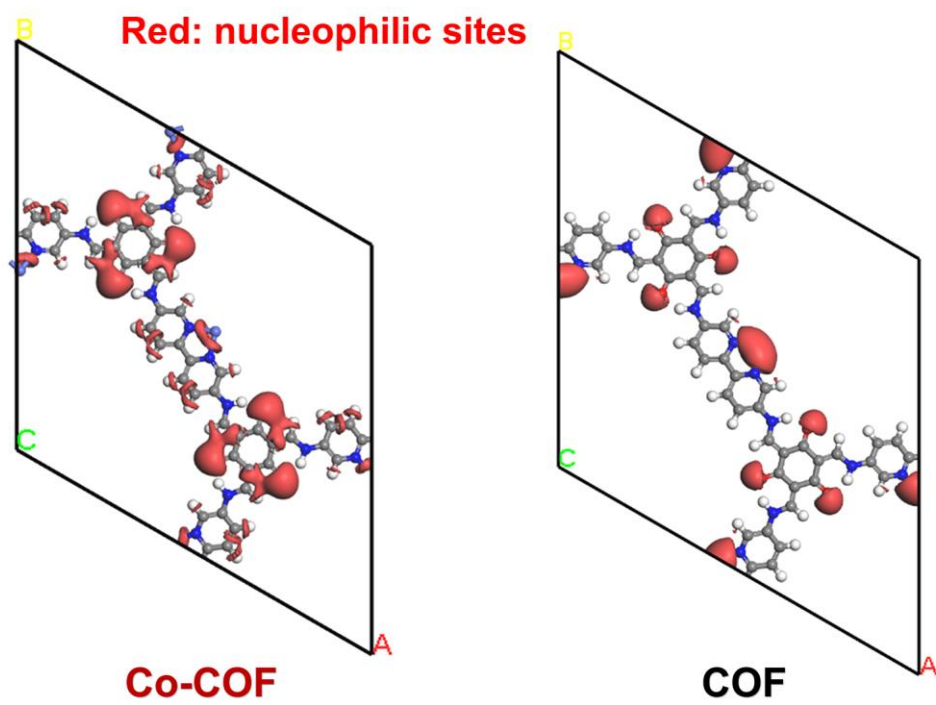

Fig. S19. The spatial distribution calculated by the Fukui function for Co-COF and COF to exhibit the nucleophilic sites.

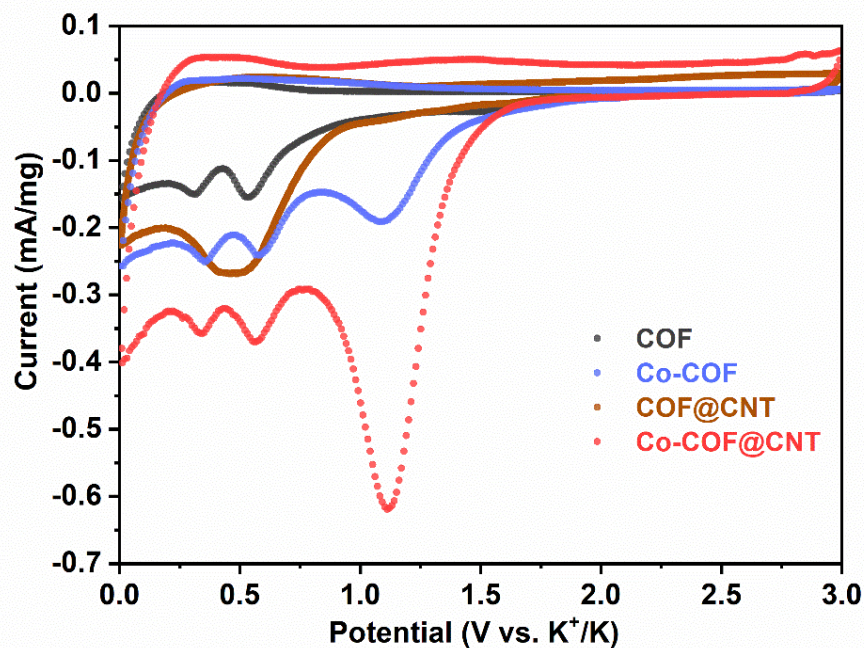

**Fig. S20.** CV curves of the TP-BPY-COF, Co-COF, COF@CNT, and Co-COF@CNT electrodes for PIBs during 0.01-3.0 V at  $0.1 \text{ mV s}^{-1}$ . Notes: TP-BPY-COF (black), Co-COF (purple), COF@CNT (brown), and Co-COF@CNT (red).

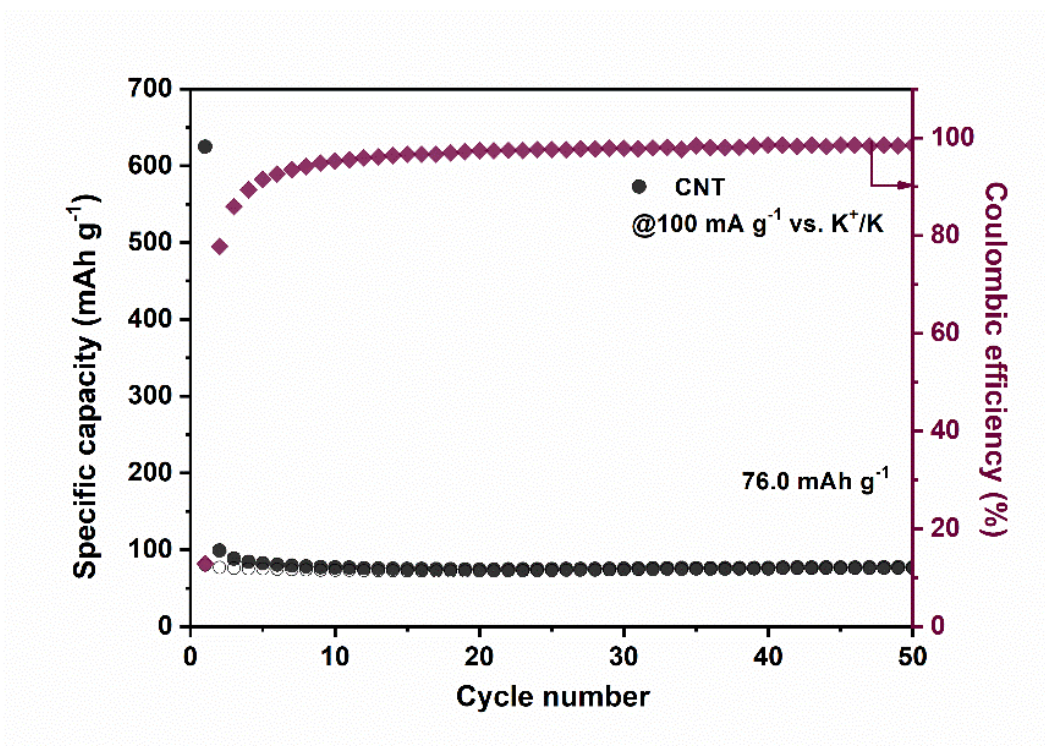

**Fig. S21. Cycling performance of CNTs for PIBs.** Specific capacity of CNTs at a high current density of 100 mA g<sup>-1</sup> vs. K<sup>+</sup>/K.

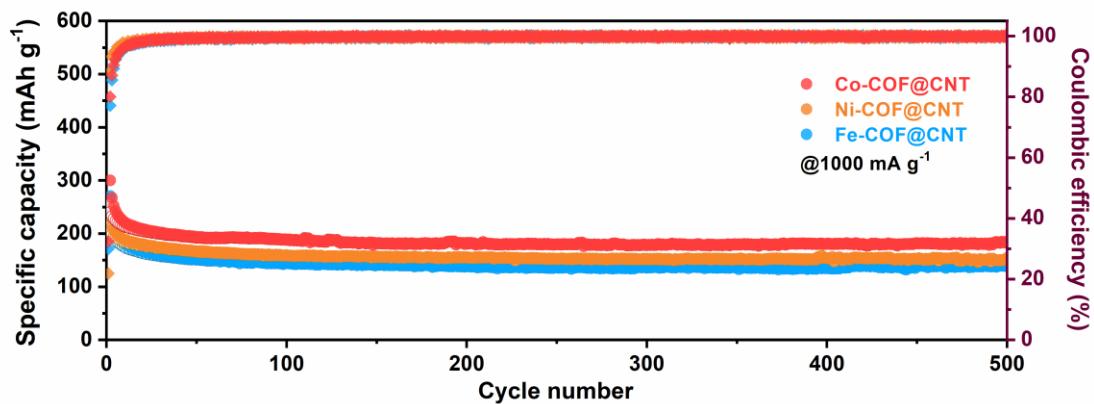

**Fig. S22. Cycling performances of Fe-COF@CNT, Ni-COF@CNT, and Co-COF@CNT for PIBs.** Specific capacity of Fe-COF@CNT, Ni-COF@CNT, and Co-COF@CNT at a current density of 1000 mA g<sup>-1</sup> vs. K<sup>+</sup>/K.





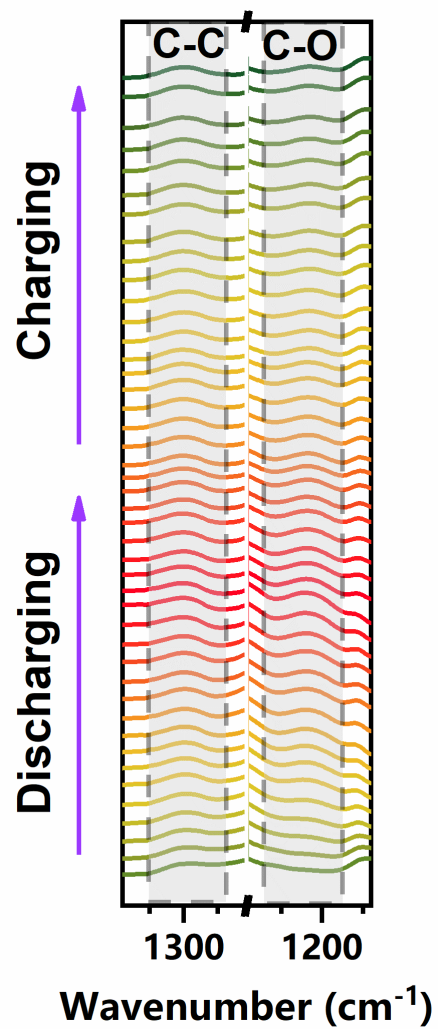

Fig. S24. *In-situ* FT-IR spectra of the Co-COF@CNT electrode in PIBs. Notes: upward indicates the generation.

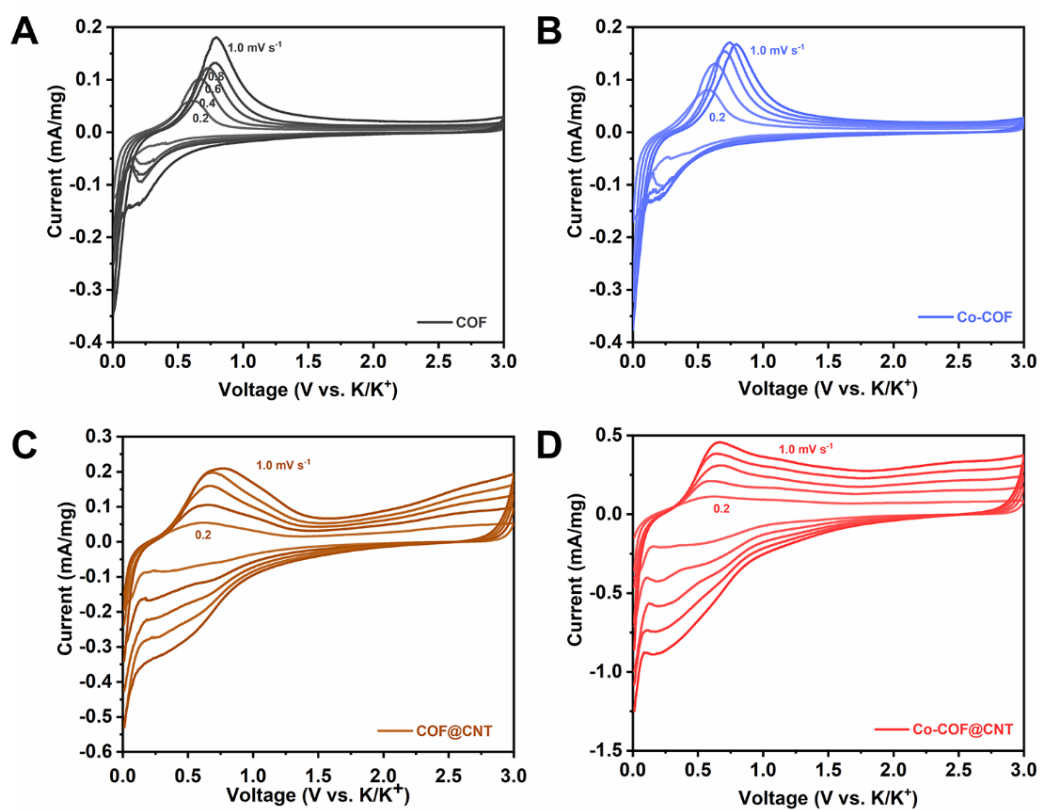

**Fig. S25.** CV curves at different scan rates ranging from 0.2 to 1.0 mV s<sup>-1</sup> vs. K<sup>+</sup>/K. (A) TP-BPY-COF, (B) Co-COF, (C) COF@CNT, and (D) Co-COF@CNT.

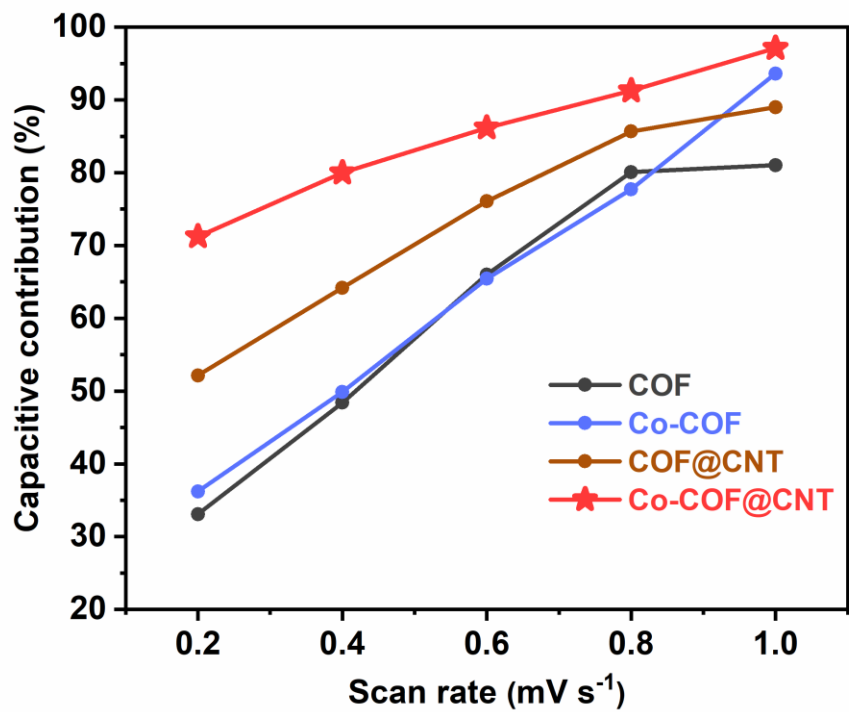

Fig. S26. The capacitive contribution of TP-BPY-COF (black), Co-COF (purple), COF@CNT (brown), and Co-COF@CNT (red) in PIBs.

**Table S1. K-edge fitting parameters of Co-COF.**

| Sample | shell | N | R<br>[Å] | $\Delta E_0$<br>[eV] | $\sigma^2$<br>[ $10^{-3}\text{\AA}^2$ ] | R-factor |
|--------|-------|---|----------|----------------------|-----------------------------------------|----------|
| Co-COF | Co-N  | 2 | 2.14     | 2.75                 | 3.0                                     | 1.7%     |
| Co-COF | Co-O  | 4 | 2.00     | -7.60                | 7.5                                     | 1.7%     |

N: coordination numbers; R: the internal atomic distance;  $\sigma^2$ : Debye-Waller factor;  $\Delta E_0$ : the edge-energy shift.

**Table S2. Electrochemical properties comparison between Co-COF@CNT and previous related organic polymer anodes for PIBs.**

| Materials                                                                           | Retained<br>Reversible<br>Capacity<br>[mA h g <sup>-1</sup> ] | Cycle<br>Number/<br>Current<br>Density<br>[mA g <sup>-1</sup> ] | Rate Capacity<br>@Current<br>Density<br>[mA g <sup>-1</sup> ] | Ref.                                                                |
|-------------------------------------------------------------------------------------|---------------------------------------------------------------|-----------------------------------------------------------------|---------------------------------------------------------------|---------------------------------------------------------------------|
| <b>Co-COF@CNT</b>                                                                   | <b>449</b>                                                    | <b>150/100</b>                                                  | <b>301 @500</b>                                               | <b>This work</b>                                                    |
| 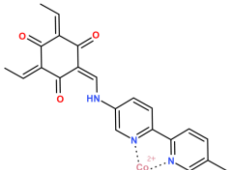   | <b>185</b>                                                    | <b>500/1000</b>                                                 | <b>184 @2000</b>                                              |                                                                     |
| <b>COF-10@CNT</b>                                                                   | 288                                                           | 500/100                                                         | ~200@500<br>~100@2000                                         | <i>ACS Nano</i> <b>2019</b> , 13,<br>3600                           |
|  |                                                               |                                                                 |                                                               |                                                                     |
| <b>PIM@KB</b>                                                                       | 110                                                           | 500/100                                                         | 130@500<br>118@2000                                           | <i>Small</i> <b>2020</b> , 16,<br>2002953                           |
|  |                                                               |                                                                 |                                                               |                                                                     |
| <b>COF@Co</b>                                                                       | 371                                                           | 400/100                                                         | ~160@500<br>105@2000                                          | <i>ACS Appl. Mater. Interfaces</i> <b>2021</b> , 13,<br>48913-48922 |
|  |                                                               |                                                                 |                                                               |                                                                     |
| <b>E-FCTF</b>                                                                       | 228                                                           | 100/100                                                         | ~150@500<br>58@2000                                           | <i>ACS Nano</i> <b>2019</b> , 13,<br>14252                          |
|  |                                                               |                                                                 |                                                               |                                                                     |

|                                                                                   |     |         |                     |                                                     |  |
|-----------------------------------------------------------------------------------|-----|---------|---------------------|-----------------------------------------------------|--|
| CTF-0                                                                             |     |         |                     |                                                     |  |
| 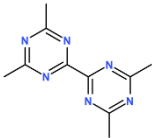 | 113 | 200/100 | ~84@500<br>63@1000  | <i>Chem. Sci.</i> <b>2019</b> , <i>10</i> ,<br>7695 |  |
| CTF-1                                                                             |     |         |                     |                                                     |  |
|  | 60  | 200/100 | ~39@500<br>31@1000  | <i>Chem. Sci.</i> <b>2019</b> , <i>10</i> ,<br>7695 |  |
| PyBT                                                                              |     |         |                     |                                                     |  |
|  | 272 | 500/50  | ~200@200<br>104@500 | <i>ACS Nano</i> <b>2019</b> , <i>13</i> ,<br>745    |  |

**Table S3. Electrochemical properties comparison between Co-COF@CNT and previous representative carbon anodes for PIBs.**

| <b>Materials</b>           | <b>Retained Reversible Capacity [mA h g<sup>-1</sup>]</b> | <b>Cycle Number</b> | <b>Current Density [mA g<sup>-1</sup>]</b> | <b>Ref.</b>                                               |
|----------------------------|-----------------------------------------------------------|---------------------|--------------------------------------------|-----------------------------------------------------------|
| <b>Co-COF@CNT</b>          | <b>449</b>                                                | <b>150</b>          | <b>100</b>                                 | <b>This work</b>                                          |
|                            | <b>185</b>                                                | <b>500</b>          | <b>1000</b>                                |                                                           |
| CNC<br>(carbon nanocage)   | 195                                                       | 100                 | 200                                        | <i>Adv. Energy Mater.</i> <b>2018</b> , 8, 1801149        |
| GNC-600<br>(N-doped)       | 280                                                       | /                   | 50                                         | <i>Adv. Funct. Mater.</i> <b>2019</b> , 29, 1903641       |
| NCNF-650<br>(N, O-doped)   | 248                                                       | 25                  | 100                                        | <i>Nat. Commun.</i> <b>2018</b> , 9, 1720                 |
| CNFF<br>(carbon nanofiber) | 158                                                       | 2000                | 1000                                       | <i>Nano Lett.</i> <b>2018</b> , 18, 7407                  |
| PNCM<br>(N-doped)          | 260                                                       | 120                 | 100                                        | <i>Adv. Mater.</i> <b>2017</b> , 29, 1702268              |
| Hollow carbon<br>(N-doped) | 340                                                       | /                   | 100                                        | <i>J. Am. Chem. Soc.</i> <b>2018</b> , 140, 7127          |
| NHC<br>(N-doped)           | 161                                                       | 1600                | 1000                                       | <i>Energy Environ. Sci.</i> <b>2019</b> , 12, 1605        |
| N-HPC<br>(N-doped)         | 292                                                       | 400                 | 100                                        | <i>Nano Lett.</i> <b>2019</b> , 19, 4965                  |
| NPC<br>(N-doped)           | 342                                                       | 500                 | 100                                        | <i>Adv. Energy Mater.</i> <b>2018</b> , 8, 1802386        |
| FFGF<br>(F-doping)         | 165                                                       | 200                 | 500                                        | <i>ACS Appl. Mater. Interfaces</i> <b>2016</b> , 8, 20682 |
| S-RGO-600<br>(S-doping)    | 297                                                       | /                   | 100                                        | <i>Nano Energy</i> <b>2018</b> , 53, 415                  |
| SNHC<br>(S, N-doped)       | 213                                                       | 500                 | 100                                        | <i>Adv. Energy Mater.</i> <b>2019</b> , 9, 1901379        |
| NOHPHC<br>(N, O-doped)     | 130                                                       | 1100                | 1050                                       | <i>Adv. Mater.</i> <b>2018</b> , 30, 1700104              |

|                            |     |      |      |                                                    |
|----------------------------|-----|------|------|----------------------------------------------------|
| PCMs<br>(S, O-doped)       | 108 | 2000 | 1000 | <i>Adv. Energy Mater.</i> <b>2018</b> , 8, 1800171 |
| PHC-700<br>(P, O-doped)    | 260 | 1000 | 200  | <i>Adv. Energy Mater.</i> <b>2019</b> , 9, 1901676 |
| N, P-VG@CC<br>(N, P-doped) | 345 | 1000 | 25   | <i>Small</i> <b>2019</b> , 15, 1901285             |
